# Supplementary material
Source: publisher figshare collection journal article supplement (https://rs.figshare.com/ndownloader/files/16783658)
Supplement: Supplementary file 1 [file 16783658]

## Sheet: Suppl_table1.1_all
					Sfp1 full length					Sfp1 delta
Species	Order	tissue	available	publication	Name	protein sequence	e-value	total score	Sfp1-like length (aa)	e-value	total score	hit length	Name	proteinsequence	comments
Asterias rubens	Forcipulatida	tubefeet		Hennebert et al. 2015	GenBank: AHN92641.1	MKAALLVVLLVACSANLVTSHDATPASCQDVLAQGNTHDGMYEIDPDGAGGEPQFQVYCELAGGKGVSIIHHDAECADREACKVDGFEEPGSFVKKVNYKGNIKQIEALIDLSGYCEQFLSYEAHASVIFWQPQNKNYAWWQNRNNRVMQNWGGAPTGTHGCGCSTEAEGCIEKKRCNADCNTHQLTIDSGYLNDKDNLPVTELHFGDTGTLTDNEYGFYKLGPIRCSGGPTHKEQEIPVFNTDTIYQYRYDLPRIKPGECRIVFEVQACNDAFIGFSEQEGEQAELIELNIGGWGNSKTVIRNCKQCQTESAIEESILSCDEPKKFFVSWCTGTFTFGREGHGSLLSWNPPRSIHPTHVAFSTGYGATGTFSFDSFFSKEIHTCQNQKADINCGSRFV…			3853			597		MKAALLVVLLVACSANLVTSHDATPASCQDVLAQGNTHDGMYEIDPDGAGGEPQFQVYCELAGGKGVSIIHHDAECADREACKVDGFEEPGSFVKKVNYKGNIKQIEALIDLSGYCEQFLSYEAHASVIFWQPQNKNYAWWQNRNNRVMQNWGGAPTGTHGCGCSTEAEGCIEKKRCNADCNTHQLTIDSGYLNDKDNLPVTELHFGDTGTLTDNEYGFYKLGPIRCSGGPTHKEQEIPVFNTDTIYQYRYDLPRIKPGECRIVFEVQACNDAFIGFSEQEGEQAELIELNIGGWGNSKTVIRNCKQCQTESAIEESILSCDEPKKFFVSWCTGTFTFGREGHGSLLSWNPPRSIHPTHVAFSTGYGATGTFSFDSFFSKEIHTCQNQKADINCGSRFV…	same as full length
Asterias rubens	Forcipulatida	ovaries	http://www.echinobase.org/Echinobase/Blast/OvaryTranscriptome/blast.php	Reich et al. 2015	>GAUU01011857.1 TSA: Asterias rubens AMR0022.23095.1.1	GYTTAGLTVSIDTPNVVVTTDSGIVIRWDGRYLVEVDVTGDYFNHVEGLCGNYNSDQEDEFTTRMGMLVDDPQKFGRSWNVEDTNVVAGVEPCVDCVDCVLPEPCADATVKGKAQEVCSQLIDASGPFQECHGTVDPATAYKNCMTDMCTMPEGLAYCEDYQFYAEECLDKQITISWRRADFCFVDCLVMNMVYSPKSPACPSNCANPTAALTCNLADRENCVCPTGQLKEGKDCVAIEKCGCLHEASGEYYRQGESVITKDCLTICSCNGYNNLDCKTYSCAANEFCGAKEGETLCMCEDGFFRDPASKKCLEIPFPQTLVIPQHQQAMIECQDERFINILDAHFGNPKQAEICLEVSGDQSCNAESSISRMKALCQNKHSCIPQALIKQFGDPCFED…	0.0	964	463	0.0	964	463	>GAUU01011857.1 TSA: Asterias rubens AMR0022.23095.1.1	GYTTAGLTVSIDTPNVVVTTDSGIVIRWDGRYLVEVDVTGDYFNHVEGLCGNYNSDQEDEFTTRMGMLVDDPQKFGRSWNVEDTNVVAGVEPCVDCVDCVLPEPCADATVKGKAQEVCSQLIDASGPFQECHGTVDPATAYKNCMTDMCTMPEGLAYCEDYQFYAEECLDKQITISWRRADFCFVDCLVMNMVYSPKSPACPSNCANPTAALTCNLADRENCVCPTGQLKEGKDCVAIEKCGCLHEASGEYYRQGESVITKDCLTICSCNGYNNLDCKTYSCAANEFCGAKEGETLCMCEDGFFRDPASKKCLEIPFPQTLVIPQHQQAMIECQDERFINILDAHFGNPKQAEICLEVSGDQSCNAESSISRMKALCQNKHSCIPQALIKQFGDPCFED…	same as full length
Pisaster ochraceus	Forcipulatida	muscle samples	echinodb	Linchangco et al. 2017	>639499-Pisaster-ochraceus	MKAMLLIVVLLVVSSANYVTSHGEEGIPASCQDVLALGHSDDGQYEIDPDGPGGEPPFQVYCELARGKGVTILHHDAEFDDREDRRVDGHEEAGSFVKKVNYKGNIKQIEALLDLSGYCEQFISYEAHASVMFWPPENKNYGYWMNRAGRVMQNWGGAPTGTHGCGCSTEAEGCIEKKRCNADCNTHQLTVDGGYLNDKDNLPVTELRFGDTGTYDDDEYGYYKLGPIRCSGGPTQREQEIPFFKTDTIYHYRYDLPRITPGECRIEFEVQACNDAFIGFSEEEGEQAELIELNIGGWSNSKTVFRNCKQCQTEVELKEHVLSCDAPKRFWVSWCSGTFSFGREGHGQLLGWVPPRSIHPKFVAYTTGYGATGRFSFDSFFAKEIHTCQNQKAEINCGS…	0.0	6315.33	3851	0	1445.18	3851	>639499-Pisaster-ochraceus	MKAMLLIVVLLVVSSANYVTSHGEEGIPASCQDVLALGHSDDGQYEIDPDGPGGEPPFQVYCELARGKGVTILHHDAEFDDREDRRVDGHEEAGSFVKKVNYKGNIKQIEALLDLSGYCEQFISYEAHASVMFWPPENKNYGYWMNRAGRVMQNWGGAPTGTHGCGCSTEAEGCIEKKRCNADCNTHQLTVDGGYLNDKDNLPVTELRFGDTGTYDDDEYGYYKLGPIRCSGGPTQREQEIPFFKTDTIYHYRYDLPRITPGECRIEFEVQACNDAFIGFSEEEGEQAELIELNIGGWSNSKTVFRNCKQCQTEVELKEHVLSCDAPKRFWVSWCSGTFSFGREGHGQLLGWVPPRSIHPKFVAYTTGYGATGRFSFDSFFAKEIHTCQNQKAEINCGS…	same as full length
Labidiaster annulatus	Forcipulatida	muscle samples	echinodb	Linchangco et al. 2017	>780680-Labidiaster-annulatus	ILSCDGTKRFWVSWCSGTFNFGREGHGQLLSWNPPRSMNWKHIAYSTGYGSSGKFSFDSFFAKEIHTCQNEKADINCGNKYINIVFANYGRSTRSHCSHRYMKSTSCMSSKSLEVVGMQCHGKHKCRITVNNGVFGNPCCGTYKYLHAKYRCDDKPRVKRFTNNACENHKCNPLGGRCQPKHGTEYHCACKTNFFGTYCDREYAMCRAHGDPHYTPFNGKCYDYQGMCKYILAQPCVDNGEFNFKIVGVNKVASWNNRVSYNRGMELKIGSVNIVLLQEKQAYIGNVISNIPCEAEDIKIDRDGKYMVVTSEKHGVKVYWDGNEVFKILVDRNLYKDNMCGLCGSISASRNDPFMMKNGTTTFDANTFGNSWIANPFECPSCVDCVPLSFCKNNPEFLA…	0.0	4955.58	3524	0	1282.24	3524	>780680-Labidiaster-annulatus	ILSCDGTKRFWVSWCSGTFNFGREGHGQLLSWNPPRSMNWKHIAYSTGYGSSGKFSFDSFFAKEIHTCQNEKADINCGNKYINIVFANYGRSTRSHCSHRYMKSTSCMSSKSLEVVGMQCHGKHKCRITVNNGVFGNPCCGTYKYLHAKYRCDDKPRVKRFTNNACENHKCNPLGGRCQPKHGTEYHCACKTNFFGTYCDREYAMCRAHGDPHYTPFNGKCYDYQGMCKYILAQPCVDNGEFNFKIVGVNKVASWNNRVSYNRGMELKIGSVNIVLLQEKQAYIGNVISNIPCEAEDIKIDRDGKYMVVTSEKHGVKVYWDGNEVFKILVDRNLYKDNMCGLCGSISASRNDPFMMKNGTTTFDANTFGNSWIANPFECPSCVDCVPLSFCKNNPEFLA…	same as full length
Odinella nutrix	Brisingida	muscle samples	echinodb	Linchangco et al. 2017	-		-			-
Periboblaster BJ30 folliculatus	Velatida	muscle samples	echinodb	Linchangco et al. 2017	>358942-Peribolaster-BJ30_folliculatus	IGTQCPNSCGNPNAEAECTGEVGPMCVCNEGMFLEEGDRCIAEEDCGCTYDGAYYRKGVTFVADDCSERCTCGKDSTAVCEDLTCHVSAECSVVNGMCDCNCIQGFSGDGSRDCTKIITEKEIIVCEEQMLSIDCSAEFINILDVDYSSTQRGDCPVIDGDGEFNVNLFVTDRCSSKTNCAFKVGSETFGHQGTSLKSLYVKYACVPLESVTTPRNFFVRELRACELDSLDIDCGHLKISLVRAFYGRIQEVTDCSLEDDQPLGQDCSATSAYNTVGQVCHGQQSCRLDAWTDVFGDDPCPGVSKYLEIHYRCEANPAELVLIKDHCNPNPCVNGICQAISVDELYNCKCDPGFTGDHCETGKATCTALGDPHYVTFDGLLYDYMGDCQYTLVKSADAE…	0.0	885.174	979	0	677.92		>358942-Peribolaster-BJ30_folliculatus	IGTQCPNSCGNPNAEAECTGEVGPMCVCNEGMFLEEGDRCIAEEDCGCTYDGAYYRKGVTFVADDCSERCTCGKDSTAVCEDLTCHVSAECSVVNGMCDCNCIQGFSGDGSRDCTKIITEKEIIVCEEQMLSIDCSAEFINILDVDYSSTQRGDCPVIDGDGEFNVNLFVTDRCSSKTNCAFKVGSETFGHQGTSLKSLYVKYACVPLESVTTPRNFFVRELRACELDSLDIDCGHLKISLVRAFYGRIQEVTDCSLEDDQPLGQDCSATSAYNTVGQVCHGQQSCRLDAWTDVFGDDPCPGVSKYLEIHYRCEANPAELVLIKDHCNPNPCVNGICQAISVDELYNCKCDPGFTGDHCETGKATCTALGDPHYVTFDGLLYDYMGDCQYTLVKSADAE…	same as full length
Periboblaster BJ19 folliculatus	Velatida	muscle samples	echinodb	Linchangco et al. 2017	>723660-Peribolaster-BJ19_folliculatus	TGGWCAAERDQTGFLQVDFKVKRRCGGIKTQGMNSPTRKWRVTKYIVQCSDDAVSWKDITDKKGNTIMFGGNNDQDSEVANFFPGIKECRAVRVYPMKWEGAYPAMRLELIGLPEVTKQPEVGFSCRKRDDCGSGGFTFVIPSKTFEADGYLIGLRFRACRKGSFKVIVFRPVNEAEQTYKLVGMRRIRAKKAKTEVEVMFRKKKRMPVKQGDMIGF	1.08 × 10-73	253.447	217	-
Remaster gourdoni	Velatida	muscle samples	echinodb	Linchangco et al. 2017	>804273-Remaster-gourdoni	VTFDGLLYDYMGDCQYTLVKSADAEVLDADGNVIDFEVVVQNEASRRNPSMSSTIGVTFTYFGNTIQLKHGGAVLLNEETIEGYDADFLKITTSFPAVTVTTDVGIQIRWDGKYLVEVDLSAHYFDHVEGLCGNYNSDPSDDFITRMRLPVDNPLTFGQSWVVLGEIPCDECVDCLVPDACQEVSIKTMAEDSCQNIINPEGAFAACHDTFAPETYFKNCMQDMCAMPEGLAYCEDYQYYAEKCKSKGFIIYWRRTDFCSIDCKAKDMMYNPSSPSCPATCSDRKASLKCSTPDIEDCVCLPGMIKENNVCIRVEDCGCVDPDSRVYYRKGDSYITTDCTKSCSCIGPDNLECSAAFCPINEVCDIRNGEPGCFCEENCLRDEETNKCEVIPVPRVLIF…	5.41 × 10-166	535.028	605	0	534.64	605	>804273-Remaster-gourdoni	VTFDGLLYDYMGDCQYTLVKSADAEVLDADGNVIDFEVVVQNEASRRNPSMSSTIGVTFTYFGNTIQLKHGGAVLLNEETIEGYDADFLKITTSFPAVTVTTDVGIQIRWDGKYLVEVDLSAHYFDHVEGLCGNYNSDPSDDFITRMRLPVDNPLTFGQSWVVLGEIPCDECVDCLVPDACQEVSIKTMAEDSCQNIINPEGAFAACHDTFAPETYFKNCMQDMCAMPEGLAYCEDYQYYAEKCKSKGFIIYWRRTDFCSIDCKAKDMMYNPSSPSCPATCSDRKASLKCSTPDIEDCVCLPGMIKENNVCIRVEDCGCVDPDSRVYYRKGDSYITTDCTKSCSCIGPDNLECSAAFCPINEVCDIRNGEPGCFCEENCLRDEETNKCEVIPVPRVLIF…	same as full length, only delta region
Xyloplax janetae	Velatida	muscle samples	echinodb	Linchangco et al. 2017	-		-			-
Pteraster tesselatus	Velatida	muscle samples	echinodb	Linchangco et al. 2017	>895691-Pteraster-tesselatus	MVHFNMAGVWRLCLVQLLATLCITTWQASANDELGVPLSCADLYAQGEINDGEYEIDPDGDGVGLPPVKVECSMSGGRGITIVHHSKESNDPEDRKVDGFEEPGSFAVKPEYNADYKQVVALADLSGYCEQYVSYVAHGSVMFWKCDNNRAYAYWRNRNEKKMLNWGGAPTGTVGCGCSIRATGCGERLQCNADANTHTDSEDEGFLNDKSQLPVSSLHFGDTGEKGDKEYGYYKLGPLKCSGGPTSIEPEAPWYKTNTDYFYRYLLPDLGPGECRIEFKVQACNDAFIGLSESMDEQNNLYEINLGGWGNTKSVIRCSKQGEVQVKYAEPVLDCDSSKGFWVSWCDHCIRVGRQDENSFMSYCPQRTVAPRHIAFTTGYSADGSFQFASFFAKDMHTC…	0.0	3553.45	3847	6.26 × 10-151	963.7	3847	>895691-Pteraster-tesselatus	MVHFNMAGVWRLCLVQLLATLCITTWQASANDELGVPLSCADLYAQGEINDGEYEIDPDGDGVGLPPVKVECSMSGGRGITIVHHSKESNDPEDRKVDGFEEPGSFAVKPEYNADYKQVVALADLSGYCEQYVSYVAHGSVMFWKCDNNRAYAYWRNRNEKKMLNWGGAPTGTVGCGCSIRATGCGERLQCNADANTHTDSEDEGFLNDKSQLPVSSLHFGDTGEKGDKEYGYYKLGPLKCSGGPTSIEPEAPWYKTNTDYFYRYLLPDLGPGECRIEFKVQACNDAFIGLSESMDEQNNLYEINLGGWGNTKSVIRCSKQGEVQVKYAEPVLDCDSSKGFWVSWCDHCIRVGRQDENSFMSYCPQRTVAPRHIAFTTGYSADGSFQFASFFAKDMHTC…	same as full length
Psilaster charcoti	Paxillosida	muscle samples	echinodb	Linchangco et al. 2017	>753554-Psilaster-charcoti	YAKTIINIRCNNHDKCSVPVSSLTFGSFADKIWKALYVKYQCRETVSTGITNTDIELTSCENSPVMLDCQHFKVDVIAAAFGRQQGDHTCASDAQENQALNQDCVVSSAFHKVVELCHTMSMCNINTVPETFGTDPCPDTSKYLRVHFKCSANPDPKVLEDDKCEPNPCVNGVCEAVTIEPKYNCKCAPGFTGQHCDLGTATCQALGDPHYISFDGKEYDFMGHCKYTLVKNADADVPDFEVVVYNQAARRNPAMSSTIQVELHYAGHVILLKPQGETLLDGRRIEGLMNDQMTISVNYPDVVIKTTIGVEIRWDGWFMVEVDVTGDYFGHTEGLCGTYNGNPDDDYLTRFGETLDDPATFGRSWFVPGDDACEDCVDCELPEPCDDAAIKDAAQTICN…	0.0	802.357	803	0	623.22	803	>753554-Psilaster-charcoti	YAKTIINIRCNNHDKCSVPVSSLTFGSFADKIWKALYVKYQCRETVSTGITNTDIELTSCENSPVMLDCQHFKVDVIAAAFGRQQGDHTCASDAQENQALNQDCVVSSAFHKVVELCHTMSMCNINTVPETFGTDPCPDTSKYLRVHFKCSANPDPKVLEDDKCEPNPCVNGVCEAVTIEPKYNCKCAPGFTGQHCDLGTATCQALGDPHYISFDGKEYDFMGHCKYTLVKNADADVPDFEVVVYNQAARRNPAMSSTIQVELHYAGHVILLKPQGETLLDGRRIEGLMNDQMTISVNYPDVVIKTTIGVEIRWDGWFMVEVDVTGDYFGHTEGLCGTYNGNPDDDYLTRFGETLDDPATFGRSWFVPGDDACEDCVDCELPEPCDDAAIKDAAQTICN…	same as full length
Astropecten duplicatus	Paxillosida	muscle samples	echinodb	Linchangco et al. 2017	>208141-Astropecten-duplicatus	FLKALSYRKVRNLENPQVGDEIIMRRHKGRDTAFSFNAILTQEGVGTSKETLPPISCTGGLGMENGAIPDTSISFSSAVDPTPSLVRLNAANAWTAMDKDDHPYVMIKIGEEARLTGIATQGNPQYEAWVNSFDIEYTASINHVTKQPQNFQWVKFDKDTKDTFPGNMDQNTVKTNYFTDDIEALYVRLHIRMFHNAPSLRLELLGCSTQDPCDPNPCKNGAFCRKTADSFGYTCACSVSWSGKNCDIRTRKCHAYGDPHYYSFDGKKFNFQGDCTYILSQTKSSSTQQHFVVKADNVKNPERSSVSLTRRVFVSIDGKTYDFEQKRKVFVSAKGSNREHISTPYNTDGVSIVSGANNRIELRTDFGLTVLWDGKSKVDIYLPEYYKNQVEGICGNYNG…	0.0	1359.36	1512	1.34 × 10-159	738.78	1512	>208141-Astropecten-duplicatus	FLKALSYRKVRNLENPQVGDEIIMRRHKGRDTAFSFNAILTQEGVGTSKETLPPISCTGGLGMENGAIPDTSISFSSAVDPTPSLVRLNAANAWTAMDKDDHPYVMIKIGEEARLTGIATQGNPQYEAWVNSFDIEYTASINHVTKQPQNFQWVKFDKDTKDTFPGNMDQNTVKTNYFTDDIEALYVRLHIRMFHNAPSLRLELLGCSTQDPCDPNPCKNGAFCRKTADSFGYTCACSVSWSGKNCDIRTRKCHAYGDPHYYSFDGKKFNFQGDCTYILSQTKSSSTQQHFVVKADNVKNPERSSVSLTRRVFVSIDGKTYDFEQKRKVFVSAKGSNREHISTPYNTDGVSIVSGANNRIELRTDFGLTVLWDGKSKVDIYLPEYYKNQVEGICGNYNG…	same as full length
Luidia clathrata	Paxillosida	muscle samples	echinodb	Linchangco et al. 2017	>37680-Luidia-clathrata	KDIFTGNSNASSPKTNYFTEELEAQVLRIHVESFHKKASMRLELVGCPVKKPCDPNPCKNHAPCIETQASLGYTCQCPSRKGGKNCEKDLTDCQASGDPHYKNFDQQNFDYQGRCNYVLTQTKLTSQQEHFRVTADNEPWHWNAATLTREVYVSIGDLDFVMKKNRQLSLNGECLNPPFARDGVAVYNTHAKLVLKTHFGLVVEWNGNNVVQIYLPDNYRGEVEGICGNFNGVQGDDYVPRGQTNSINNVNDFGDSWRTGDECGPCANCQETDPCRVEDPKYPGVNKLEKAQEACKAIIDDKGAFAMCHAVVDPQAAYKNCMFDFCETYPLQDDLCENIEVYETQCIEAMVQVGLWRVPGFCAADCPSREH	8.96 × 10-94	317.39	371	1.37 × 10-76	252.29	303	>50324-Luidia-clathrata	GVLTGPNGNRIGAVYTGVLNITVTTDNTKMETNFGLTVNWDGLYGLTATIPETFKGHVQGLCGTYSGAPAEVYTTRLGTTVDDPVKFGNSWAIPDETCETCEDCEIPAPCADEPEMKLEAQAICNNIISETGPFVQCHAVASPDKIYKDCMMDHCAMPQGMAYCGHYHTYADECKKHDIIIGWRQPDFCFINCLARSMVYNPSGTACPASCVDPLAPASCQQPTREECVCSPDKLMEEGVCIRKEDCGCVHKEGGGIYYKKDESFLTEGCGKECKCVDQKVICQIFSCPANEMCGKANGTTRC	best hit for Sfp1delta different to full length
Luidia clathrata	Paxillosida	ovaries	http://www.echinobase.org/Echinobase/Blast/OvaryTranscriptome/blast.php	Reich et al. 2018	>GAVQ01043958.1 TSA: Luidia clathrata AMR0027.51365.0.2	VVDEGYLDDKDTLPVTALFFGDTGQNGDNEYGFYKLGPVKCKGGPTSFEKAIPEFYTSNGNAFRYDLPDLTDGDCRVEFRIKGTQNVYIGFAADRFQGDNMVVLGFRGATQIVFQRCKTCFPAAHVNVQDFLSPDKYKSMWVSWCDGCFRFGSRGKNEMLSYCPHRPPGIIRNVPFFSMDPAHIKFMSSYSKEAITCEGKHFDIDCGDKFIDILGANYGRNSLNVCPSQYVQSNNCNNINSFSIVGNQCQGKKKCRGPVGSGLFTDPCPGTYKYLRVKYRCTNSNIRKEFLPEVCIDHQCNPRGGTCLAYTSTDYVCRCRDNFGGKYCQSDLRECYGQGDPHYKGFNGARFDFQGGCKYILAQTCTSYSEKQFKVIGINYLYESVGVAVTQGLIVQIGS…	e-114	418	508	3e-99	364	447	>GAVQ01023879.1 TSA: Luidia clathrata -delta	PHYVDFDGRPFNFMGSCRYTFVKNRDDQVPSFEVIAFNQATRRSNRYSSTVGASLNLNGEVYTMEQGGVLTGPNGNRIGAVYTGVLNITINSGTTKMKTNFGLTVNWDGIYGLTATIPETFKGHVQGLCGTYSGAPAEVYTTRLGATVDDPVKFGNSWAIPDETCETCEDCEIPAPCADEPEMKLEAQAICNNIISETGPFVQCHAVASPDKIYKDCMMDQCAMPQGLAYCGHYHTYADECKKHDIIIGWRQPDFCFIDCLAKSMVYNPSGTACPASCVDPLAPAKCQQPTREECVCSPDKLMEEGVCIRKEDCGCVHKEGGGIYYKKDESFLTEGCGKECKCVDQEVICQIFSCPPNEMCGKVNGTTRCVCREGYFREEKQDLCVEIPVPKVFVQPLE…	best hit for Sfp1delta different to full length
Cheiraster hirsutus	Notomyotida	muscle samples	echinodb	Linchangco et al. 2017	-		-			-
Echinaster spinulosus	Spinulosida	muscle samples	echinodb	Linchangco et al. 2017	>818697-Echinaster-spinulosus	RGRRRHRWIKGWVRSYLVQYSPDCDNWQYVMKPNGQRQRFEGNNNPTSKVTNFLEVPVYARCIRIRPLAHHRKIGLRLELLGCPAQDSPTTNPCYNGGTRREAAGLNPNGFVCKCPPGWTGDRCETEEGTCRSAGDSHYTTFDGRRFYFPGECTYTLAKDGGNGENVTFDILSNNAGTGREIYVLTNDMTFELKQEGNVLIEGEACKLPVKRNGVTIMHNAYTGVLLETSYGLSVEFDGHHRVVISLPATYAGKVNGLCGNFNGSAEDDIPTGLFEVEFGQSFTVEPEKCQPCVKCALPMPCERNPDRLEEAARQCQPIANPAGPFAACHNITNQIEAFEDCLQDVCDSSSLSRVPRCTQLAEYADLCAEKGYQTQSY	6.17 × 10-54	202.216	378	-
Henricia leviuscula A	Spinulosida	muscle samples	echinodb	Linchangco et al. 2017	>107629-Henricia-leviuscula	CGQNATCGTRDGVYGCFCDEGFSGNGISCTGIQGDTAALVCDHEILNIYCGPKRYIDIVEAVYGRKENYERCPTKKQSEGECSAESAMSVTVAKCQGKETCSFQVTSEVFGDPCYGVGKYLEVDYQCTYAPQAKIASEEVMKRVCQGDGMEIDCGDSYIQVVDAVYGRLTSGQVCLGGDIESSDCRSPASLSTVQLLCQGKNKCEGIHASNYVFGGNPCARTFKYLEVRYKCSAVQVSVPPNPCAAEPCMNGGTCILIDAAMENGKGYKCSCPHDWTGQNCDIEEVSCRASGVSHILDFNEKDFDFLGDSKYDFASSCLDNKHNFRIMIKKSRSAVKNDVSTIKAVHVHYDNKVLELKQEYKVLLDGKQVSDTMNLNFGKIKLCRVGNYLLVKTDFEMI…	3.16 × 10-74	275.404	898	2.00 × 10-44	334.7	898	>107629-Henricia-leviuscula	CGQNATCGTRDGVYGCFCDEGFSGNGISCTGIQGDTAALVCDHEILNIYCGPKRYIDIVEAVYGRKENYERCPTKKQSEGECSAESAMSVTVAKCQGKETCSFQVTSEVFGDPCYGVGKYLEVDYQCTYAPQAKIASEEVMKRVCQGDGMEIDCGDSYIQVVDAVYGRLTSGQVCLGGDIESSDCRSPASLSTVQLLCQGKNKCEGIHASNYVFGGNPCARTFKYLEVRYKCSAVQVSVPPNPCAAEPCMNGGTCILIDAAMENGKGYKCSCPHDWTGQNCDIEEVSCRASGVSHILDFNEKDFDFLGDSKYDFASSCLDNKHNFRIMIKKSRSAVKNDVSTIKAVHVHYDNKVLELKQEYKVLLDGKQVSDTMNLNFGKIKLCRVGNYLLVKTDFEMI…	same as full length
Asteropsis carinifera	Valvatida	muscle samples	echinodb	Linchangco et al. 2017	>284348-Asteropsis-carinifera	GDSKFDFKRNREVFVNDERIFCPYDRDGISVVDGGNQRVVLRTEFGLTVSWDGKSKVDIFLTEDYKEQVEGLCGNYNGKQGDDFIIRSSAELTTDLAKFGESWGIDPTCKACDDCEEKDECRLSGKLEEAQDACGILLDGRGPFAGCDGKVDAIFYENCLYDFCAMGMDNLCDDIQKFYDECIDNGGTPGNWRSAGFCESKCPVNMVFNPIGTSCPDTCGNPDASKDCSGASEPGCFCMPGLYMEDGDRCVEYEQCGCTYEGVYKKKGAAFMSEDCSEICTCDDDHNAACVDAGCHERAECQLRGGVRGCFCENGWSGDGIESCEEILEPVDVVVCESGVLNIDCSQEGKRIEILEAVYGTGPRDECPETANNAEEENFRYAPAIIRNRCHNQGSCSVS…	0.0	1145.95	1187	0	819.66	1187	>284348-Asteropsis-carinifera	GDSKFDFKRNREVFVNDERIFCPYDRDGISVVDGGNQRVVLRTEFGLTVSWDGKSKVDIFLTEDYKEQVEGLCGNYNGKQGDDFIIRSSAELTTDLAKFGESWGIDPTCKACDDCEEKDECRLSGKLEEAQDACGILLDGRGPFAGCDGKVDAIFYENCLYDFCAMGMDNLCDDIQKFYDECIDNGGTPGNWRSAGFCESKCPVNMVFNPIGTSCPDTCGNPDASKDCSGASEPGCFCMPGLYMEDGDRCVEYEQCGCTYEGVYKKKGAAFMSEDCSEICTCDDDHNAACVDAGCHERAECQLRGGVRGCFCENGWSGDGIESCEEILEPVDVVVCESGVLNIDCSQEGKRIEILEAVYGTGPRDECPETANNAEEENFRYAPAIIRNRCHNQGSCSVS…	same as full length
Glabraster antarctica	Valvatida	muscle samples	echinodb	Linchangco et al. 2017	>281881-Glabraster-antarctica	VLQSDDQEGMLGCHCDAGWTGDGFTVCSEILEPIDLVACEDEVLMIDCTSSYERIEILEVDYSPQSRIECPDTADNAEAEPHRYAKTIILDRCHNKGKCTVSVGSRVFGSYADTVFKSLYVRYQCRETVTTGIVNREVKLLSCEGGGLDIDCGALKVDVIQAEYGRAQGDHTCPTEGSAVLNGDCFASSAFRVVLEACQTNSMCTVDAIMTSYGDDPCPGTSKFLEVHYRCDANPDIKVIEDDKCDPDPCVNGVCEAVATGARYNCKCNPDFTGTHCDIGKATCMALGDPHYITFDGLDYDFMGHCKYTLVKNADGSVPDFEVIVYNEAARRNPAMSSTVQVEFRYDGHVIELMYGGATTMDGVLIEGYSEDNLIISVNYPEVVIETNIGVELRWDGRF…	0.0	873.618	880	0	637.86	880	>281881-Glabraster-antarctica	VLQSDDQEGMLGCHCDAGWTGDGFTVCSEILEPIDLVACEDEVLMIDCTSSYERIEILEVDYSPQSRIECPDTADNAEAEPHRYAKTIILDRCHNKGKCTVSVGSRVFGSYADTVFKSLYVRYQCRETVTTGIVNREVKLLSCEGGGLDIDCGALKVDVIQAEYGRAQGDHTCPTEGSAVLNGDCFASSAFRVVLEACQTNSMCTVDAIMTSYGDDPCPGTSKFLEVHYRCDANPDIKVIEDDKCDPDPCVNGVCEAVATGARYNCKCNPDFTGTHCDIGKATCMALGDPHYITFDGLDYDFMGHCKYTLVKNADGSVPDFEVIVYNEAARRNPAMSSTVQVEFRYDGHVIELMYGGATTMDGVLIEGYSEDNLIISVNYPEVVIETNIGVELRWDGRF…	same as full length
Patiria pectinifera	Valvatida	tubefeet		Kim et al. 2017	>Gene.133761_TR149301-Patiria-pectinifera	MKATWLVALLVVCLLHRATCSDVPCSCADVKARGSSHSGDYDIDPGNGVMSVYCDMSGSEPITIVHHDHEFENREDRLVDNCEDPGSFTASINYNAGPEQVIALADNSEYCEQFISYVAHGSVMRWKVENRIYGWWENRRGRKMTNWGGAPTGTDGCGCSVSSTGCNEGMQCNADCNIHADNEDSGFLRDKSHLPVTSLRFGDTGTFDDDEYGYYELGPLRCKGGPVQQEQEIPLIETNTEYHYRYDLPPLDNGDFRVEFEVRAKNDVFLGFSETKGEQSDLVELNMGGWGNSKTVFRKCKQCTPQATWKENNVVSWEETKGYWVDWSDGCFRLGRAGASQSLSWCPPRIKNWKYVAFTTGYGSSGKFWFNSFHSKVQHFCEHETAYINCGSKYVNIVN…	0.0	4122.39	3856	0.0	676.35	754	>Gene.134855_TR149716-Patiria-pectinifera	DVELIACQGSDLEIECSNLKVDLIHADFGRRQGDYICSTDDSEALTQDCFAPSALFKMVQACHLSPMCTINAIPDTFGSDPCPNTNKYLRIHYRCDTAPDPRELEEDKCEPNPCGDNGKCEAISLEPKYNCKCNPGFTGTHCDIGTSRCTALGDPHYISFDGKKFSFMGHCKYTLVKNADAEVPDFEVIVFNEAARRNPTMSSTVQVQFNYNGKAINLKYGGQTLVDGIRTEGVDTPELKISVNYPDVVIETNIGVTIFWDGKFMVEVDVTGEYYGHTEGLCGTYNGNPDDDYLTRFGETLDPADETNIPIFGRSWFVAGGGCEDCVDCELPEECSDAGVKDAAQEICNNIISDDGPFQSCHVAVSPSFYFKSCVTDLCTMPDGLAHCDDYQAYAEACR…	best hit for Sfp1delta different to full length
Patiria pectinifera	Valvatida	ovaries	http://www.echinobase.org/Echinobase/Blast/OvaryTranscriptome/blast.php	Reich et al. 2016	>GAVK01038102.1 TSA: Patiria pectinifera AMR0034.61676.0.3	GTHCDIGTSRCTALGDPHYISFDGKKFSFMGHCKYTLVKNADAEVPDFEVIVFNEAARRNPTMSSTVQVQFNYNGKAINLKYGGQTLVDGIRTEGVDTPELKISVNYPDVVIETNIGVTIFWDGKFMVEVDVTGEYYGHTEGLCGTYNGNPDDDYLTRFGETLDPADETNIPIFGRSWFVAGGGCEDCVDCELPEECSDAGVKDAAQEICNNIISDDGPFQSCHVAVSPSFYFKSCVTDLCTMPDGLAHCDDYQAYAEACRDQGIIVNWRRQDFCLIDCLAKNMVYNPLSPSCPTTCANPTASSTCNQADREDCVCPTGMIKEGETCIDEERCGCVDHVTGFYYRQGETFMTADCSKVCSCAAAHDLQCVQFQCQPHEVCGARDAAPACICDKGYFRDT…	e-148	531	479	e-141	505	479	>GAVK01038102.1 TSA: Patiria pectinifera AMR0034.61676.0.3	GTHCDIGTSRCTALGDPHYISFDGKKFSFMGHCKYTLVKNADAEVPDFEVIVFNEAARRNPTMSSTVQVQFNYNGKAINLKYGGQTLVDGIRTEGVDTPELKISVNYPDVVIETNIGVTIFWDGKFMVEVDVTGEYYGHTEGLCGTYNGNPDDDYLTRFGETLDPADETNIPIFGRSWFVAGGGCEDCVDCELPEECSDAGVKDAAQEICNNIISDDGPFQSCHVAVSPSFYFKSCVTDLCTMPDGLAHCDDYQAYAEACRDQGIIVNWRRQDFCLIDCLAKNMVYNPLSPSCPTTCANPTASSTCNQADREDCVCPTGMIKEGETCIDEERCGCVDHVTGFYYRQGETFMTADCSKVCSCAAAHDLQCVQFQCQPHEVCGARDAAPACICDKGYFRDT…	same as full length
Acanthaster planci	Valvatida	tubefeet	http://marinegenomics.oist.jp/cots/blast/search?project_id=46	Hall et al. 2017	>oki.213.32.t1-Acanthaster-planci	MFDAAVQAARLIPANQIVDCSDYLLKSLAVEGYHHFPSRLTRKNHGRQQYLPDWFSFPEHTERKFSERVNRMTATWLVALLVVCLSHRATCFNGLPSSCADILSQGSSDSGDYDIDAGNGQMTVYCDMSGDEPISIVHHDHEYADREDRKVDNCEEPGSFSAEITYTVSLEKVVALADISEYCEQYISYISHGSVLTWFQENLPYGWWENRFHKKMKNWGGAATGTIGCGCSVSPQGCKEGRQCNADWNIHQDIEDSGFLRDKLSLPVTRLRFGDTGTLDDDEYGFYELGPLRCKGGPTTKEKEIPIIKTNTDYHYRYDLRPLESGECRVEFEVAANNDVFLGFSETKDEQSDLIELNIAGWGNSRTVFRECKQCKPQANWREKGLVSKNEMRGFWVEW…	0.0	4075	3910	3e-180	570	3910	>oki.213.32.t1-Acanthaster-planci	MFDAAVQAARLIPANQIVDCSDYLLKSLAVEGYHHFPSRLTRKNHGRQQYLPDWFSFPEHTERKFSERVNRMTATWLVALLVVCLSHRATCFNGLPSSCADILSQGSSDSGDYDIDAGNGQMTVYCDMSGDEPISIVHHDHEYADREDRKVDNCEEPGSFSAEITYTVSLEKVVALADISEYCEQYISYISHGSVLTWFQENLPYGWWENRFHKKMKNWGGAATGTIGCGCSVSPQGCKEGRQCNADWNIHQDIEDSGFLRDKLSLPVTRLRFGDTGTLDDDEYGFYELGPLRCKGGPTTKEKEIPIIKTNTDYHYRYDLRPLESGECRVEFEVAANNDVFLGFSETKDEQSDLIELNIAGWGNSRTVFRECKQCKPQANWREKGLVSKNEMRGFWVEW…	same as full length
Asterina gibbosa	Valvatida	tubefeet		this paper	>Unigene5412_AG_TF1-Asterina-gibbosa	MGCVKQFHVQYSSDGQTFEYVTDDHGEADIFESRCRCQKHIKNFFRSALMTRFIRVEPVLWKNAISMRVDFIGRDIEVDEPDVAGTDAPVDEAEVDMAVVLKGRPFKRCGFLKGIKYRPFNAESFTVAVVRQIKDSEDTFELIGSTYVTTSGKDRLQRFEVAEENDRIPVKKGDYLCLIFPKAVIGYSASDDPKDVVLTASLGFDEYKAITMNGQINFPNKDGRKYSGVRPIFQVATTKTIPPVMSTGSLGVEEGQVKDEQITASSFCDAHSKAERARLGLKDQQGMTGGWCGRELDQSAFIQVDFKKVRRCGGVVTQGLSSATRFWFVRLYIVQCSLDLTAWEDILDDDGNIMMFDGNSDQDTEKPNFFAEVKNCRALRIRPMVWSGPYPALRFDILG…	0.0	3948.18	3333	9.57 × 10-174	859.72	3333	>Unigene5412_AG_TF1-Asterina-gibbosa	MGCVKQFHVQYSSDGQTFEYVTDDHGEADIFESRCRCQKHIKNFFRSALMTRFIRVEPVLWKNAISMRVDFIGRDIEVDEPDVAGTDAPVDEAEVDMAVVLKGRPFKRCGFLKGIKYRPFNAESFTVAVVRQIKDSEDTFELIGSTYVTTSGKDRLQRFEVAEENDRIPVKKGDYLCLIFPKAVIGYSASDDPKDVVLTASLGFDEYKAITMNGQINFPNKDGRKYSGVRPIFQVATTKTIPPVMSTGSLGVEEGQVKDEQITASSFCDAHSKAERARLGLKDQQGMTGGWCGRELDQSAFIQVDFKKVRRCGGVVTQGLSSATRFWFVRLYIVQCSLDLTAWEDILDDDGNIMMFDGNSDQDTEKPNFFAEVKNCRALRIRPMVWSGPYPALRFDILG…	same as full length
Leptasterias sp.	Forcipulatida	ovaries	http://www.echinobase.org/Echinobase/Blast/OvaryTranscriptome/blast.php	Reich et al. 2015	>GAVC01057609.1 TSA: Leptasterias sp. AR-2014 AMR0026.43740.1.2	VWTDVADEGGNTIMFGGNFDQETEVKNFFPKLVITQSLRVKPMMWMGNFPSMRMDVLGLADTVSDKPEVGFSTNVREATGSGGFSFAIPEKKFLTDGYVKGLYFRAAKVGSFKFIVFREINVEKMVYQVVGVRHITIKKAEIELSIDFKGDHRLAVKKGDMIGFNFCRSVLYKAMEGDDLVSVVYARNREIVNYRSMKAGSFVEFTGVAERSYSVKALFEGASPGEVVLSVDAKKPVGLANGVLPDNSITVSSTYVHEGDTRIFGGQSCRLRHVGMHENLGGAWVPDVADENPWLQVDSKVEGTVTGIITQGRHAKVNWWVTSYTISYSINCEDWLTVEDANGEVVFIGNVDSDTEVQRFFPSALNARCMRVHPRNFLGRIAMRLELLGNFEIAANEYG…	0.0	2753	1664	0	947	684	>GAVC01029086.1 TSA: Leptasterias sp.-delta	CTISSDTALFGRDECPEVRKYATVLYQCEKTPDPRVLEDDKCDPNPCVNGECEAISIEPKFNCKCSPGFTGTTCEIGKSTCKGIGDPHYITFDEVAYDFMGPCRYTLVKNADKEVKDFEIIVTNEKARRNPSMSSTVAVDFYYDSHVIKLRSQGVTYLDEVLTNGYTSTEFTIVVAIPNVVVTTSSGIVIRWDGRYLVEVDLTGDYFNHVEGLCGNFNKDKEDDFTTRMGLLVDDVQKFGRSWNVKDIDPPAGAEVCVDCVDCVLPEPCGDAAVKGKAQEVCGQLIDPEGPFQQCHDTVDPQLAFKNCMTDMCTIPDGLAYCEDYQFYAEECNKNSITINWRRADFCFIDCRALGMVYSPKSPACPSNCANPTAALTCNLADRENCVCDAGMLKEGTDC…	best hit for Sfp1delta different to full length
Asterias amurensis	Forcipulatida	ovaries	http://www.echinobase.org/Echinobase/Blast/OvaryTranscriptome/blast.php	Reich et al. 2015	>GAVJ01055037.1 TSA: Asterias amurensis	ADVTTTAEPTTISVSSEVEAIAVGDPHYTTFDGRHFTAQGYCEYLLSSDCMAANSQFEVVLINGQSSSTYQTARTEAVRVTLGSTVILLQRDRQQVINNIRVETPAFLANDVSVRRSGGQTSVLTNIGVRVKWDGSSGVKVLLNGTLFNSMVCGLGGDSDGDTNNDFTSSAGSLSSMLAFADSYIVNPTECLDTTINVASPCNSSTSVEAASVCNDIIRSDGPFAACAAAMPTYASNFYSDCQYDVCVLYPDTSGACDIYAAFVDTCNARGYPPSDWRSASLCPLTCPPNSTYGTCISDCEVTCSDVRRGGQLESACNGLPCVEGCICDVGFYQDGNVCVPEAECGCNYNGIYYMYNETFITEGCIDICTCGLEGVVTCDLQNCSANSVCAITNYAYGC…	2e-47	3118	3118	4e-32	141	3118	>GAVJ01055037.1 TSA: Asterias amurensis	ADVTTTAEPTTISVSSEVEAIAVGDPHYTTFDGRHFTAQGYCEYLLSSDCMAANSQFEVVLINGQSSSTYQTARTEAVRVTLGSTVILLQRDRQQVINNIRVETPAFLANDVSVRRSGGQTSVLTNIGVRVKWDGSSGVKVLLNGTLFNSMVCGLGGDSDGDTNNDFTSSAGSLSSMLAFADSYIVNPTECLDTTINVASPCNSSTSVEAASVCNDIIRSDGPFAACAAAMPTYASNFYSDCQYDVCVLYPDTSGACDIYAAFVDTCNARGYPPSDWRSASLCPLTCPPNSTYGTCISDCEVTCSDVRRGGQLESACNGLPCVEGCICDVGFYQDGNVCVPEAECGCNYNGIYYMYNETFITEGCIDICTCGLEGVVTCDLQNCSANSVCAITNYAYGC…	same as full length
Asterias forbensi	Forcipulatida	ovaries	http://www.echinobase.org/Echinobase/Blast/OvaryTranscriptome/blast.php	Reich et al. 2015	>GAUS01009606.1 TSA: Asterias forbesi AMR9007.21388.0.1	TYALIGRSYITSTGQGVACKSLSEKIPVKKGDVFGIVFDKQVIGSEPDADNKVLIRKNFRPEDLNAMPITGLLDYPESDNRKFSIRVRFRIATSRTIAPVMSVTNMGLQDGLITSEQITSNGICDSNGKADRVRLGLKDQQGMLGGWCGQQIDQSAYIQIDFKRKRPCGGVITQGLSSPTRKWFVQKFIARHSVDLQTWTDVAD	e-110	403	204	9e-92	339	161	>GAUS01009270.1 TSA: Asterias forbesi -delta	GDYFNHVEGLCGNYNSDKEDEFTTRMGMLVDDPQKFGRSWNVEDTNVVAGAEPCVDCVDCVLPEPCADATVKGKAQEVCGQLIDASGPFQECHGTVDPATAYKNCMTDMCTMPEGLAYCEDYQFYAQECLDRHIIISWRRADFCFIDCLAMNMVYSPKSPA	best hit for Sfp1delta different to full length
Marthasterias glacialis	Forcipulatida	ovaries	http://www.echinobase.org/Echinobase/Blast/OvaryTranscriptome/blast.php	Reich et al. 2015	>GAVI01056138.1 TSA: Marthasterias glacialis AMR0029.84491.0.2	MSEVEYQCIVNPDPRVLEEDKCDPNPCVHGECQSISLEPKYNCKCNPGFTGTHCEIGKATCKALGDPHYITFDDVAYDFMGPCRYTLVKNADGNVKDFEVIVTNEKARRNPDMSSTVAVDFIYDKHVIKLRSKGVALIDDVKTNGYTSDDIQIVVDVPNVIVTTNAGIVIRWDGRYLVEVDVTGDYFNHVEGLCGNYNSDKEDEFITRIGLLVEDIQKFGQSWHVKETDLQAGEEECHECVGCDIPEPCRDAAVKDKAQEICGGLISDTGPFQECLGTVNPETIFKNCMMDMCAIPDGLAYCDDYQLYAEKCAYIGITINWRRDDFCKFDCKSMGMLYSPMSPACPSNCANPTASLTCNTADRENCVCVNGHLKEGGKCVAIEECGCVHQDSGEYYRKG…	0.0	974	663	0.0	845	663	>GAVI01056138.1 TSA: Marthasterias glacialis AMR0029.84491.0.2	MSEVEYQCIVNPDPRVLEEDKCDPNPCVHGECQSISLEPKYNCKCNPGFTGTHCEIGKATCKALGDPHYITFDDVAYDFMGPCRYTLVKNADGNVKDFEVIVTNEKARRNPDMSSTVAVDFIYDKHVIKLRSKGVALIDDVKTNGYTSDDIQIVVDVPNVIVTTNAGIVIRWDGRYLVEVDVTGDYFNHVEGLCGNYNSDKEDEFITRIGLLVEDIQKFGQSWHVKETDLQAGEEECHECVGCDIPEPCRDAAVKDKAQEICGGLISDTGPFQECLGTVNPETIFKNCMMDMCAIPDGLAYCDDYQLYAEKCAYIGITINWRRDDFCKFDCKSMGMLYSPMSPACPSNCANPTASLTCNTADRENCVCVNGHLKEGGKCVAIEECGCVHQDSGEYYRKG…	same as full length
Patiria miniata	Valvatida	ovaries	http://www.echinobase.org/Echinobase/Blast/OvaryTranscriptome/blast.php	Reich et al. 2017	>GAWB01005679.1 TSA: Patiria miniata AMR9002.12075.1.1	CRKPRASLGYSGSCPVEWGGKNCHIKTHKCCAYGDPHYCNFDSKKFNFQGHCEYILARTLVTTALDHFTISADNIASSRRPTVSVTREVYVEIDDKKFDFKKNREVFVNGERITCPYEIDGISVTDGGNKRVILRTEFGLVVSWDGRSKVDIHLIEDYMNQVEGLCGNYNGVNGDDFIVRGTGETTTDLDRFGESWGADETCKACTDCQEKDVCRLTDKLDEAQEACSVLNDRHGPFAMCIAVIDPVAYYESCLYDFCAMFPGQDNLCEDIQKYADECIDAGLQVGNWRRQGFCYVDCPVNMVFSQIGTLCPDTCGDQDASKDCTGQAGPMCVCMPGLFLQDGDRCVEDAQCGCTYQGVYHKNGGQFMASDCSEICSCNADHEAECVEITCNDHAECRI…	e-177	627	531	6e-88	327	531	>GAWB01004188.1 TSA: Patiria miniata-delta	PNPCGDNGKCEAISLEPKYNCKCNPGFTGTHCDIGTSRCTALGDPHYISFDGKKFSFMGHCKYTLVKNADAEVPAFEVIVFNEAARRNPSMSSTVQVQFNYNGKAINLKYGGQTLVDGIKTEGVDTPELKISVNYPDVVIETNIGVTIFWDGKFMVEVDVTGEYYGHTEGLCGTYNGNPDDDFLTRFGETLDPVDETNIPLFGRSWFVAGGGCEDCVDCELPEECSDAGVKDAAQEICNNIISDDGPFQSCHEAVSPSFYFKSCVIDLCTMPDGLAHCDDYQAYAEACRDQGIIINWRRQDFCLIDCLAKNMVYNPLSPSCP	best hit for Sfp1delta different to full length

## Sheet: Suppl_table1.2_Sfp1delta
Species	Order	Transcriptome/genome	tissue	sequencing method	available	publication	Nr	proteinsequence	e-value	total score	sequence length (aa)
Asterias rubens	Forcipulatida	transcriptome	tubefeet	Illumina paired-end 2 × 75 base		Hennebert et al. 2015	AHN92641.1	MKAALLVVLLVACSANLVTSHDATPASCQDVLAQGNTHDGMYEIDPDGAGGEPQFQVYCELAGGKGVSIIHHDAECADREACKVDGFEEPGSFVKKVNYKGNIKQIEALIDLSGYCEQFLSYEAHASVIFWQPQNKNYAWWQNRNNRVMQNWGGAPTGTHGCGCSTEAEGCIEKKRCNADCNTHQLTIDSGYLNDKDNLPVTELHFGDTGTLTDNEYGFYKLGPIRCSGGPTHKEQEIPVFNTDTIYQYRYDLPRIKPGECRIVFEVQACNDAFIGFSEQEGEQAELIELNIGGWGNSKTVIRNCKQCQTESAIEESILSCDEPKKFFVSWCTGTFTFGREGHGSLLSWNPPRSIHPTHVAFSTGYGATGTFSFDSFFSKEIHTCQNQKADINCGSRFV…			3853
Asterias rubens	Forcipulatida	transcriptome	ovaries	Illumina	http://www.echinobase.org/Echinobase/Blast/OvaryTranscriptome/blast.php	Reich et al. 2015	>GAUU01011857.1 TSA: Asterias rubens AMR0022.23095.1.1	GYTTAGLTVSIDTPNVVVTTDSGIVIRWDGRYLVEVDVTGDYFNHVEGLCGNYNSDQEDEFTTRMGMLVDDPQKFGRSWNVEDTNVVAGVEPCVDCVDCVLPEPCADATVKGKAQEVCSQLIDASGPFQECHGTVDPATAYKNCMTDMCTMPEGLAYCEDYQFYAEECLDKQITISWRRADFCFVDCLVMNMVYSPKSPACPSNCANPTAALTCNLADRENCVCPTGQLKEGKDCVAIEKCGCLHEASGEYYRQGESVITKDCLTICSCNGYNNLDCKTYSCAANEFCGAKEGETLCMCEDGFFRDPASKKCLEIPFPQTLVIPQHQQAMIECQDERFINILDAHFGNPKQAEICLEVSGDQSCNAESSISRMKALCQNKHSCIPQALIKQFGDPCFED…	0.0	964	463
Asterias forbensi (delta)	Forcipulatida	transcriptome	ovaries	Illumina	http://www.echinobase.org/Echinobase/Blast/OvaryTranscriptome/blast.php	Reich et al. 2015	>GAUS01009270.1 TSA: Asterias forbesi -delta	GDYFNHVEGLCGNYNSDKEDEFTTRMGMLVDDPQKFGRSWNVEDTNVVAGAEPCVDCVDCVLPEPCADATVKGKAQEVCGQLIDASGPFQECHGTVDPATAYKNCMTDMCTMPEGLAYCEDYQFYAQECLDRHIIISWRRADFCFIDCLAMNMVYSPKSPA	9e-92	339	161
Pisaster ochraceus	Forcipulatida	transcriptome	muscle samples		http://echinodb.uncc.edu/	Linchangco et al. 2017	>639499-Pisaster-ochraceus	MKAMLLIVVLLVVSSANYVTSHGEEGIPASCQDVLALGHSDDGQYEIDPDGPGGEPPFQVYCELARGKGVTILHHDAEFDDREDRRVDGHEEAGSFVKKVNYKGNIKQIEALLDLSGYCEQFISYEAHASVMFWPPENKNYGYWMNRAGRVMQNWGGAPTGTHGCGCSTEAEGCIEKKRCNADCNTHQLTVDGGYLNDKDNLPVTELRFGDTGTYDDDEYGYYKLGPIRCSGGPTQREQEIPFFKTDTIYHYRYDLPRITPGECRIEFEVQACNDAFIGFSEEEGEQAELIELNIGGWSNSKTVFRNCKQCQTEVELKEHVLSCDAPKRFWVSWCSGTFSFGREGHGQLLGWVPPRSIHPKFVAYTTGYGATGRFSFDSFFAKEIHTCQNQKAEINCGS…	0.0	6315.33	3851
Labidiaster annulatus	Forcipulatida	transcriptome	muscle samples		http://echinodb.uncc.edu/	Linchangco et al. 2017	>780680-Labidiaster-annulatus	ILSCDGTKRFWVSWCSGTFNFGREGHGQLLSWNPPRSMNWKHIAYSTGYGSSGKFSFDSFFAKEIHTCQNEKADINCGNKYINIVFANYGRSTRSHCSHRYMKSTSCMSSKSLEVVGMQCHGKHKCRITVNNGVFGNPCCGTYKYLHAKYRCDDKPRVKRFTNNACENHKCNPLGGRCQPKHGTEYHCACKTNFFGTYCDREYAMCRAHGDPHYTPFNGKCYDYQGMCKYILAQPCVDNGEFNFKIVGVNKVASWNNRVSYNRGMELKIGSVNIVLLQEKQAYIGNVISNIPCEAEDIKIDRDGKYMVVTSEKHGVKVYWDGNEVFKILVDRNLYKDNMCGLCGSISASRNDPFMMKNGTTTFDANTFGNSWIANPFECPSCVDCVPLSFCKNNPEFLA…	0.0	4955.58	3524
Leptasterias sp. (delta)	Forcipulatida	transcriptome	ovaries	Illumina	http://www.echinobase.org/Echinobase/Blast/OvaryTranscriptome/blast.php	Reich et al. 2015	>GAVC01029086.1 TSA: Leptasterias sp.-delta	CTISSDTALFGRDECPEVRKYATVLYQCEKTPDPRVLEDDKCDPNPCVNGECEAISIEPKFNCKCSPGFTGTTCEIGKSTCKGIGDPHYITFDEVAYDFMGPCRYTLVKNADKEVKDFEIIVTNEKARRNPSMSSTVAVDFYYDSHVIKLRSQGVTYLDEVLTNGYTSTEFTIVVAIPNVVVTTSSGIVIRWDGRYLVEVDLTGDYFNHVEGLCGNFNKDKEDDFTTRMGLLVDDVQKFGRSWNVKDIDPPAGAEVCVDCVDCVLPEPCGDAAVKGKAQEVCGQLIDPEGPFQQCHDTVDPQLAFKNCMTDMCTIPDGLAYCEDYQFYAEECNKNSITINWRRADFCFIDCRALGMVYSPKSPACPSNCANPTAALTCNLADRENCVCDAGMLKEGTDC…	0	947	684
Marthasterias glacialis	Forcipulatida	transcriptome	ovaries	Illumina	http://www.echinobase.org/Echinobase/Blast/OvaryTranscriptome/blast.php	Reich et al. 2015	>GAVI01056138.1 TSA: Marthasterias glacialis AMR0029.84491.0.2	MSEVEYQCIVNPDPRVLEEDKCDPNPCVHGECQSISLEPKYNCKCNPGFTGTHCEIGKATCKALGDPHYITFDDVAYDFMGPCRYTLVKNADGNVKDFEVIVTNEKARRNPDMSSTVAVDFIYDKHVIKLRSKGVALIDDVKTNGYTSDDIQIVVDVPNVIVTTNAGIVIRWDGRYLVEVDVTGDYFNHVEGLCGNYNSDKEDEFITRIGLLVEDIQKFGQSWHVKETDLQAGEEECHECVGCDIPEPCRDAAVKDKAQEICGGLISDTGPFQECLGTVNPETIFKNCMMDMCAIPDGLAYCDDYQLYAEKCAYIGITINWRRDDFCKFDCKSMGMLYSPMSPACPSNCANPTASLTCNTADRENCVCVNGHLKEGGKCVAIEECGCVHQDSGEYYRKG…	0.0	974	663
Peribolaster BJ30 folliculatus	Velatida	transcriptome	muscle samples		http://echinodb.uncc.edu/	Linchangco et al. 2017	>358942-Peribolaster-BJ30_folliculatus	IGTQCPNSCGNPNAEAECTGEVGPMCVCNEGMFLEEGDRCIAEEDCGCTYDGAYYRKGVTFVADDCSERCTCGKDSTAVCEDLTCHVSAECSVVNGMCDCNCIQGFSGDGSRDCTKIITEKEIIVCEEQMLSIDCSAEFINILDVDYSSTQRGDCPVIDGDGEFNVNLFVTDRCSSKTNCAFKVGSETFGHQGTSLKSLYVKYACVPLESVTTPRNFFVRELRACELDSLDIDCGHLKISLVRAFYGRIQEVTDCSLEDDQPLGQDCSATSAYNTVGQVCHGQQSCRLDAWTDVFGDDPCPGVSKYLEIHYRCEANPAELVLIKDHCNPNPCVNGICQAISVDELYNCKCDPGFTGDHCETGKATCTALGDPHYVTFDGLLYDYMGDCQYTLVKSADAE…	0.0	885.174	979
Remaster gourdoni	Velatida	transcriptome	muscle samples		http://echinodb.uncc.edu/	Linchangco et al. 2017	>804273-Remaster-gourdoni	VTFDGLLYDYMGDCQYTLVKSADAEVLDADGNVIDFEVVVQNEASRRNPSMSSTIGVTFTYFGNTIQLKHGGAVLLNEETIEGYDADFLKITTSFPAVTVTTDVGIQIRWDGKYLVEVDLSAHYFDHVEGLCGNYNSDPSDDFITRMRLPVDNPLTFGQSWVVLGEIPCDECVDCLVPDACQEVSIKTMAEDSCQNIINPEGAFAACHDTFAPETYFKNCMQDMCAMPEGLAYCEDYQYYAEKCKSKGFIIYWRRTDFCSIDCKAKDMMYNPSSPSCPATCSDRKASLKCSTPDIEDCVCLPGMIKENNVCIRVEDCGCVDPDSRVYYRKGDSYITTDCTKSCSCIGPDNLECSAAFCPINEVCDIRNGEPGCFCEENCLRDEETNKCEVIPVPRVLIF…	5.41 × 10-166	535.028	605
Pteraster tesselatus	Velatida	transcriptome	muscle samples		http://echinodb.uncc.edu/	Linchangco et al. 2017	>895691-Pteraster-tesselatus	MVHFNMAGVWRLCLVQLLATLCITTWQASANDELGVPLSCADLYAQGEINDGEYEIDPDGDGVGLPPVKVECSMSGGRGITIVHHSKESNDPEDRKVDGFEEPGSFAVKPEYNADYKQVVALADLSGYCEQYVSYVAHGSVMFWKCDNNRAYAYWRNRNEKKMLNWGGAPTGTVGCGCSIRATGCGERLQCNADANTHTDSEDEGFLNDKSQLPVSSLHFGDTGEKGDKEYGYYKLGPLKCSGGPTSIEPEAPWYKTNTDYFYRYLLPDLGPGECRIEFKVQACNDAFIGLSESMDEQNNLYEINLGGWGNTKSVIRCSKQGEVQVKYAEPVLDCDSSKGFWVSWCDHCIRVGRQDENSFMSYCPQRTVAPRHIAFTTGYSADGSFQFASFFAKDMHTC…	0.0	3553.45	3847
Psilaster charcoti	Paxillosida	transcriptome	muscle samples		http://echinodb.uncc.edu/	Linchangco et al. 2017	>753554-Psilaster-charcoti	YAKTIINIRCNNHDKCSVPVSSLTFGSFADKIWKALYVKYQCRETVSTGITNTDIELTSCENSPVMLDCQHFKVDVIAAAFGRQQGDHTCASDAQENQALNQDCVVSSAFHKVVELCHTMSMCNINTVPETFGTDPCPDTSKYLRVHFKCSANPDPKVLEDDKCEPNPCVNGVCEAVTIEPKYNCKCAPGFTGQHCDLGTATCQALGDPHYISFDGKEYDFMGHCKYTLVKNADADVPDFEVVVYNQAARRNPAMSSTIQVELHYAGHVILLKPQGETLLDGRRIEGLMNDQMTISVNYPDVVIKTTIGVEIRWDGWFMVEVDVTGDYFGHTEGLCGTYNGNPDDDYLTRFGETLDDPATFGRSWFVPGDDACEDCVDCELPEPCDDAAIKDAAQTICN…	0.0	802.357	803
Astropecten duplicatus	Paxillosida	transcriptome	muscle samples		http://echinodb.uncc.edu/	Linchangco et al. 2017	>208141-Astropecten-duplicatus	FLKALSYRKVRNLENPQVGDEIIMRRHKGRDTAFSFNAILTQEGVGTSKETLPPISCTGGLGMENGAIPDTSISFSSAVDPTPSLVRLNAANAWTAMDKDDHPYVMIKIGEEARLTGIATQGNPQYEAWVNSFDIEYTASINHVTKQPQNFQWVKFDKDTKDTFPGNMDQNTVKTNYFTDDIEALYVRLHIRMFHNAPSLRLELLGCSTQDPCDPNPCKNGAFCRKTADSFGYTCACSVSWSGKNCDIRTRKCHAYGDPHYYSFDGKKFNFQGDCTYILSQTKSSSTQQHFVVKADNVKNPERSSVSLTRRVFVSIDGKTYDFEQKRKVFVSAKGSNREHISTPYNTDGVSIVSGANNRIELRTDFGLTVLWDGKSKVDIYLPEYYKNQVEGICGNYNG…	0.0	1359.36	1512
Luidia clathrata (delta)	Paxillosida	transcriptome	ovaries		http://www.echinobase.org/Echinobase/Blast/OvaryTranscriptome/blast.php	Reich et al. 2015	>GAVQ01023879.1 TSA: Luidia clathrata -delta	PHYVDFDGRPFNFMGSCRYTFVKNRDDQVPSFEVIAFNQATRRSNRYSSTVGASLNLNGEVYTMEQGGVLTGPNGNRIGAVYTGVLNITINSGTTKMKTNFGLTVNWDGIYGLTATIPETFKGHVQGLCGTYSGAPAEVYTTRLGATVDDPVKFGNSWAIPDETCETCEDCEIPAPCADEPEMKLEAQAICNNIISETGPFVQCHAVASPDKIYKDCMMDQCAMPQGLAYCGHYHTYADECKKHDIIIGWRQPDFCFIDCLAKSMVYNPSGTACPASCVDPLAPAKCQQPTREECVCSPDKLMEEGVCIRKEDCGCVHKEGGGIYYKKDESFLTEGCGKECKCVDQEVICQIFSCPPNEMCGKVNGTTRCVCREGYFREEKQDLCVEIPVPKVFVQPLE…	3e-99	364	447
Asteropsis carinifera	Valvatida	transcriptome	muscle samples		http://echinodb.uncc.edu/	Linchangco et al. 2017	>284348-Asteropsis-carinifera	GDSKFDFKRNREVFVNDERIFCPYDRDGISVVDGGNQRVVLRTEFGLTVSWDGKSKVDIFLTEDYKEQVEGLCGNYNGKQGDDFIIRSSAELTTDLAKFGESWGIDPTCKACDDCEEKDECRLSGKLEEAQDACGILLDGRGPFAGCDGKVDAIFYENCLYDFCAMGMDNLCDDIQKFYDECIDNGGTPGNWRSAGFCESKCPVNMVFNPIGTSCPDTCGNPDASKDCSGASEPGCFCMPGLYMEDGDRCVEYEQCGCTYEGVYKKKGAAFMSEDCSEICTCDDDHNAACVDAGCHERAECQLRGGVRGCFCENGWSGDGIESCEEILEPVDVVVCESGVLNIDCSQEGKRIEILEAVYGTGPRDECPETANNAEEENFRYAPAIIRNRCHNQGSCSVS…	0.0	1145.95	1187
Glabraster antarctica	Valvatida	transcriptome	muscle samples		http://echinodb.uncc.edu/	Linchangco et al. 2017	>281881-Glabraster-antarctica	VLQSDDQEGMLGCHCDAGWTGDGFTVCSEILEPIDLVACEDEVLMIDCTSSYERIEILEVDYSPQSRIECPDTADNAEAEPHRYAKTIILDRCHNKGKCTVSVGSRVFGSYADTVFKSLYVRYQCRETVTTGIVNREVKLLSCEGGGLDIDCGALKVDVIQAEYGRAQGDHTCPTEGSAVLNGDCFASSAFRVVLEACQTNSMCTVDAIMTSYGDDPCPGTSKFLEVHYRCDANPDIKVIEDDKCDPDPCVNGVCEAVATGARYNCKCNPDFTGTHCDIGKATCMALGDPHYITFDGLDYDFMGHCKYTLVKNADGSVPDFEVIVYNEAARRNPAMSSTVQVEFRYDGHVIELMYGGATTMDGVLIEGYSEDNLIISVNYPEVVIETNIGVELRWDGRF…	0.0	873.618	880
Patiria pectinifera	Valvatida	transcriptome	ovaries		http://www.echinobase.org/Echinobase/Blast/OvaryTranscriptome/blast.php	Reich et al. 2015	>GAVK01038102.1 TSA: Patiria pectinifera AMR0034.61676.0.3	GTHCDIGTSRCTALGDPHYISFDGKKFSFMGHCKYTLVKNADAEVPDFEVIVFNEAARRNPTMSSTVQVQFNYNGKAINLKYGGQTLVDGIRTEGVDTPELKISVNYPDVVIETNIGVTIFWDGKFMVEVDVTGEYYGHTEGLCGTYNGNPDDDYLTRFGETLDPADETNIPIFGRSWFVAGGGCEDCVDCELPEECSDAGVKDAAQEICNNIISDDGPFQSCHVAVSPSFYFKSCVTDLCTMPDGLAHCDDYQAYAEACRDQGIIVNWRRQDFCLIDCLAKNMVYNPLSPSCPTTCANPTASSTCNQADREDCVCPTGMIKEGETCIDEERCGCVDHVTGFYYRQGETFMTADCSKVCSCAAAHDLQCVQFQCQPHEVCGARDAAPACICDKGYFRDT…	e-148	531	479
Patiria pectinifera	Valvatida	transcriptome	tubefeet	Illumina HiSeq 2500		Kim et al. 2017	>Gene.133761_TR149301-Patiria-pectinifera	MKATWLVALLVVCLLHRATCSDVPCSCADVKARGSSHSGDYDIDPGNGVMSVYCDMSGSEPITIVHHDHEFENREDRLVDNCEDPGSFTASINYNAGPEQVIALADNSEYCEQFISYVAHGSVMRWKVENRIYGWWENRRGRKMTNWGGAPTGTDGCGCSVSSTGCNEGMQCNADCNIHADNEDSGFLRDKSHLPVTSLRFGDTGTFDDDEYGYYELGPLRCKGGPVQQEQEIPLIETNTEYHYRYDLPPLDNGDFRVEFEVRAKNDVFLGFSETKGEQSDLVELNMGGWGNSKTVFRKCKQCTPQATWKENNVVSWEETKGYWVDWSDGCFRLGRAGASQSLSWCPPRIKNWKYVAFTTGYGSSGKFWFNSFHSKVQHFCEHETAYINCGSKYVNIVN…	0.0	4122.39	3856
Patiria pectinifera (delta)	Valvatida	transcriptome	tubefeet	Illumina HiSeq 2501		Kim et al. 2017	>Gene.134855_TR149716-Patiria-pectinifera	DVELIACQGSDLEIECSNLKVDLIHADFGRRQGDYICSTDDSEALTQDCFAPSALFKMVQACHLSPMCTINAIPDTFGSDPCPNTNKYLRIHYRCDTAPDPRELEEDKCEPNPCGDNGKCEAISLEPKYNCKCNPGFTGTHCDIGTSRCTALGDPHYISFDGKKFSFMGHCKYTLVKNADAEVPDFEVIVFNEAARRNPTMSSTVQVQFNYNGKAINLKYGGQTLVDGIRTEGVDTPELKISVNYPDVVIETNIGVTIFWDGKFMVEVDVTGEYYGHTEGLCGTYNGNPDDDYLTRFGETLDPADETNIPIFGRSWFVAGGGCEDCVDCELPEECSDAGVKDAAQEICNNIISDDGPFQSCHVAVSPSFYFKSCVTDLCTMPDGLAHCDDYQAYAEACR…	0.0	676.35	754
Acanthaster planci	Valvatida	transcriptome	tubefeet	Illumina HiSeq 2500	http://marinegenomics.oist.jp/cots/blast/search?project_id=46	Hall et al. 2017	>oki.213.32.t1-Acanthaster-planci	MFDAAVQAARLIPANQIVDCSDYLLKSLAVEGYHHFPSRLTRKNHGRQQYLPDWFSFPEHTERKFSERVNRMTATWLVALLVVCLSHRATCFNGLPSSCADILSQGSSDSGDYDIDAGNGQMTVYCDMSGDEPISIVHHDHEYADREDRKVDNCEEPGSFSAEITYTVSLEKVVALADISEYCEQYISYISHGSVLTWFQENLPYGWWENRFHKKMKNWGGAATGTIGCGCSVSPQGCKEGRQCNADWNIHQDIEDSGFLRDKLSLPVTRLRFGDTGTLDDDEYGFYELGPLRCKGGPTTKEKEIPIIKTNTDYHYRYDLRPLESGECRVEFEVAANNDVFLGFSETKDEQSDLIELNIAGWGNSRTVFRECKQCKPQANWREKGLVSKNEMRGFWVEW…	0.0	4075	3910
Asterina gibbosa	Valvatida	transcriptome	tubefeet	Illumina paired-end		this publication	>Unigene5412_AG_TF1-Asterina-gibbosa	MGCVKQFHVQYSSDGQTFEYVTDDHGEADIFESRCRCQKHIKNFFRSALMTRFIRVEPVLWKNAISMRVDFIGRDIEVDEPDVAGTDAPVDEAEVDMAVVLKGRPFKRCGFLKGIKYRPFNAESFTVAVVRQIKDSEDTFELIGSTYVTTSGKDRLQRFEVAEENDRIPVKKGDYLCLIFPKAVIGYSASDDPKDVVLTASLGFDEYKAITMNGQINFPNKDGRKYSGVRPIFQVATTKTIPPVMSTGSLGVEEGQVKDEQITASSFCDAHSKAERARLGLKDQQGMTGGWCGRELDQSAFIQVDFKKVRRCGGVVTQGLSSATRFWFVRLYIVQCSLDLTAWEDILDDDGNIMMFDGNSDQDTEKPNFFAEVKNCRALRIRPMVWSGPYPALRFDILG…	0.0	3948.18	3333
Patiria miniata	Valvatida	transcriptome	ovaries		http://www.echinobase.org/Echinobase/Blast/OvaryTranscriptome/blast.php	Reich et al. 2015	>GAWB01005679.1 TSA: Patiria miniata AMR9002.12075.1.1	CRKPRASLGYSGSCPVEWGGKNCHIKTHKCCAYGDPHYCNFDSKKFNFQGHCEYILARTLVTTALDHFTISADNIASSRRPTVSVTREVYVEIDDKKFDFKKNREVFVNGERITCPYEIDGISVTDGGNKRVILRTEFGLVVSWDGRSKVDIHLIEDYMNQVEGLCGNYNGVNGDDFIVRGTGETTTDLDRFGESWGADETCKACTDCQEKDVCRLTDKLDEAQEACSVLNDRHGPFAMCIAVIDPVAYYESCLYDFCAMFPGQDNLCEDIQKYADECIDAGLQVGNWRRQGFCYVDCPVNMVFSQIGTLCPDTCGDQDASKDCTGQAGPMCVCMPGLFLQDGDRCVEDAQCGCTYQGVYHKNGGQFMASDCSEICSCNADHEAECVEITCNDHAECRI…	e-177	627	531
Patiria miniata (delta)	Valvatida	transcriptome	ovaries		http://www.echinobase.org/Echinobase/Blast/OvaryTranscriptome/blast.php	Reich et al. 2015	>GAWB01004188.1 TSA: Patiria miniata-delta	PNPCGDNGKCEAISLEPKYNCKCNPGFTGTHCDIGTSRCTALGDPHYISFDGKKFSFMGHCKYTLVKNADAEVPAFEVIVFNEAARRNPSMSSTVQVQFNYNGKAINLKYGGQTLVDGIKTEGVDTPELKISVNYPDVVIETNIGVTIFWDGKFMVEVDVTGEYYGHTEGLCGTYNGNPDDDFLTRFGETLDPVDETNIPLFGRSWFVAGGGCEDCVDCELPEECSDAGVKDAAQEICNNIISDDGPFQSCHEAVSPSFYFKSCVIDLCTMPDGLAHCDDYQAYAEACRDQGIIINWRRQDFCLIDCLAKNMVYNPLSPSCP	6e-88	327	531
